# Supplementary material for: Ovarian Stimulation in Mice Resulted in Abnormal Placentation through Its Effects on Proliferation and Cytokine Production of Uterine NK Cells
Source: MDPI journal article supplement (doi:10.3390/ijms24065907), 2023-03-21
Supplement: s1 [file s1]

## *Supplementary Material*

### **1 Supplementary Data**

Supplementary Table S1 Q-RT-PCR primers sequences for expressed imprinted genes.

| <b>Name</b>  | <b>Forward (5'→3')</b>   | <b>Reverse (5'→3')</b>  |
|--------------|--------------------------|-------------------------|
| CXCL10       | CAACTGCATCCATATCGATGAC   | GATTCCGGATTTCAGACATCTCT |
| CXCL11       | GTAACGGCTGCGACAAAGTTGAAG | GAGGCGAGCTTGCTTGGATCTG  |
| CXCL12       | TGCATCAGTGACGGTAAACCA    | TTCTTCAGCCGTGCAACAATC   |
| CXCL14       | GAAGATGGTTATCGTCACCACC   | CGTTCCAGGCATTGTACCACT   |
| CCL2         | TTAAAAACCTGGATCGGAACCAA  | GCATTAGCTTCAGATTTACGGGT |
| CX3CL1       | ACGAAATGCGAAATCATGTGC    | CTGTGTCGTCTCCAGGACAA    |
| IL-15        | ACATCCATCTCGTGCTACTTGT   | GCCTCTGTTTTAGGGAGACCT   |
| IL-24        | GAGCCTGCCCAACTTTTTGTG    | TGTGTTGAAGAAAGGGCCAGT   |
| PLGF         | TCTGCTGGGAACAACCTCAACA   | GTGAGACACCTCATCAGGGTAT  |
| TGF- $\beta$ | CTCCCGTGGCTTCTAGTGC      | GCCTTAGTTTGGACAGGATCTG  |
| dPRP         | TTATGGGTGCATGGATCACTCC   | CCCACGTAAGGTCATCATGGAT  |
| GAPDH        | GGTGAAGGTCGGTGTGAACG     | CTCGCTCCTGGAAGATGGTG    |

Figure S1 Isolated endometrial stromal cells was determined by immunofluorescence staining

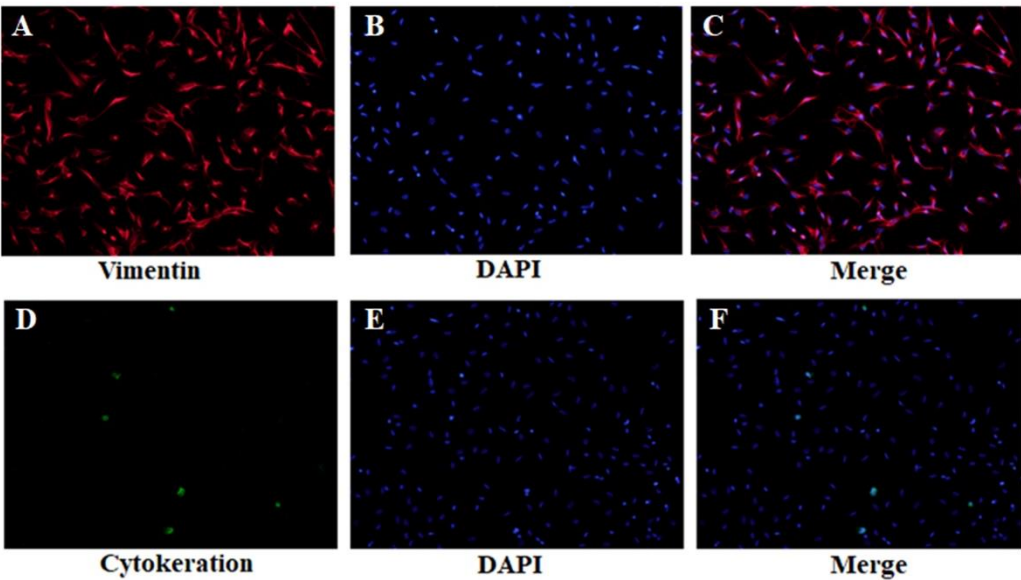

Figure S1. Identification of mouse endometrial stromal cells (100×)  
A: Vimentin; B: DAPI; C: Vimentin + DAPI; D: Cytokeration; E: DAPI; F: Cytokeration + DAPI

Figure S2 In vitro decidualization by detecting the expression of dPRP

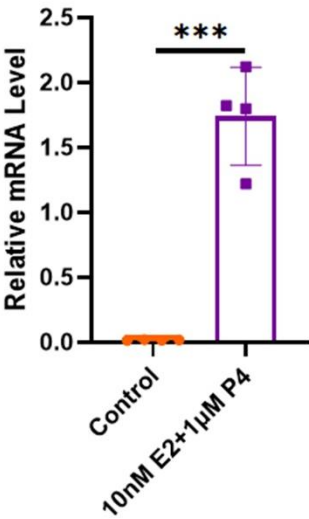

Figure S2. The expression of dPRP before or after decidualization
